# Supplementary material for: Euryachins A and B, a new type of diterpenoids from Eurya chinensis with potent NO production inhibitory activity
Source: Royal Society of Chemistry journal article supplement (doi:10.1039/c6ra11994h), 2016-01-01
Supplement: c6ra11994h1.pdf [file c6ra11994h1.pdf]

## Supporting Information

### Euryachins A and B, a New Type of Diterpenoids from *Eurya chinensis* with Potent NO Production Inhibitory Activity

Jia-Ling Song,<sup>†‡a,b</sup> Yao Yuan,<sup>‡a,b</sup> Hai-Bo Tan,<sup>a</sup> Jie-Wei Wu,<sup>a</sup> Ri-Ming Huang,<sup>a</sup> Heng Li,<sup>c</sup> Zhi-Fang Xu,<sup>a</sup> Ning Na,<sup>\*c</sup> Sheng-Xiang Qiu<sup>\*a</sup>

<sup>a</sup>*Program for Natural Product Chemical Biology, Key Laboratory of Plant Resources Conservation and Sustainable Utilization, South China Botanical Garden, Chinese Academy of Sciences, Guangzhou, 510650, People's Republic of China*

<sup>b</sup>*University of Chinese Academy of Sciences, Beijing, 100049, People's Republic of China*

<sup>c</sup>*Department of Kidney Transplantation, The Third Affiliated Hospital of Sun Yat-sen University, Guangzhou, 510650, People's Republic of China*

Tel/Fax: +86-20-82179740; nngg20102009@hotmail.com.

+86-20-37081190; E-mail: sxqiu@scbg.ac.cn.

# Supporting information list

## 1. Experimental section

General experimental procedures.

Plant material.

Extraction and isolation.

Physical and chemical properties of **1** and **2**.

Anti-inflammatory activity bioassay.

## 2. X-ray crystal data for euryachin A (**1**)

## 3. NMR, IR, HRESIMS, UV and CD spectra

- S1.  $^1\text{H}$  NMR (500 MHz;  $\text{CDCl}_3$ ) spectrum of euryachin A (**1**)
- S2.  $^{13}\text{C}$  NMR (125 MHz;  $\text{CDCl}_3$ ) spectrum of euryachin A (**1**)
- S3. DEPT-135 (125 MHz;  $\text{CDCl}_3$ ) spectrum of euryachin A (**1**)
- S4. HSQC ( $\text{CDCl}_3$ ) spectrum of euryachin A (**1**)
- S5. HMBC ( $\text{CDCl}_3$ ) spectrum of euryachin A (**1**)
- S6.  $^1\text{H}$ - $^1\text{H}$  COSY ( $\text{CDCl}_3$ ) spectrum of euryachin A (**1**)
- S7. NOESY ( $\text{CDCl}_3$ ) spectrum of euryachin A (**1**)
- S8. HRESIMS of euryachin A (**1**)
- S9. IR spectrum of euryachin A (**1**)
- S10. UV ( $\text{CH}_3\text{OH}$ ) spectra and experimental ECD (in  $\text{CH}_3\text{OH}$ ) of euryachin B (**1**)
  
- S11.  $^1\text{H}$  NMR (500 MHz;  $\text{CD}_3\text{OD}$ ) spectrum of euryachin B (**2**)
- S12.  $^{13}\text{C}$  NMR (125 MHz;  $\text{CD}_3\text{OD}$ ) spectrum of euryachin B (**2**)
- S13. DEPT-135 (125 MHz;  $\text{CD}_3\text{OD}$ ) spectrum of euryachin B (**2**)
- S14. HSQC ( $\text{CD}_3\text{OD}$ ) spectrum of euryachin B (**2**)
- S15. HMBC ( $\text{CD}_3\text{OD}$ ) spectrum of euryachin B (**2**)
- S16.  $^1\text{H}$ - $^1\text{H}$  COSY ( $\text{CD}_3\text{OD}$ ) spectrum of euryachin B (**2**)
- S17. NOESY ( $\text{CD}_3\text{OD}$ ) spectrum of euryachin B (**2**)
- S18. HRESIMS of euryachin B (**2**)
- S19. IR spectrum of euryachin B (**2**)
- S20. UV ( $\text{CH}_3\text{OH}$ ) spectra and experimental ECD (in  $\text{CH}_3\text{OH}$ ) of euryachin B (**2**)

## 1. Experimental section

**General experimental procedures.** Optical rotations were measured on a Perkin-Elmer 341 polarimeter. UV spectra were recorded in CH<sub>3</sub>OH on a Perkin-Elmer Lambda 35 UV-vis spectrophotometer. HR-ESI-MS spectra were recorded on a Bruker Bio TOF IIIQ mass spectrometer. IR spectra were acquired using a Bruker Vertex 33 infrared spectrophotometer (Bruker, Karlsruhe, Germany) with KBr disk. NMR spectra were recorded on a Bruker Advance-500 spectrometer using TMS as an internal standard. All chemical shifts were quoted on the  $\delta$  scale in ppm using residual solvent as the internal standard (CDCl<sub>3</sub>: 7.26 ppm for <sup>1</sup>H NMR, 77.0 ppm for <sup>13</sup>C NMR; CD<sub>3</sub>OD: 3.30 ppm for <sup>1</sup>H NMR, 49.90 ppm for <sup>13</sup>C NMR). Coupling constants (*J*) are reported in Hz. ECD spectra were measured with an Anton Paar MCP 500 Chirascan spectrometer. X-ray diffraction experiment was carried out on a Gemini S Ultra (Oxford Diffraction Ltd) diffractometer with a CCD area detector using Mo/CuK $\alpha$  X-ray source. All organic solvents used for extraction were of analytical grade (Shanghai Chemical Plant, Shanghai, People's Republic of China). Silica gel (200-300 mesh) (Qingdao Haiyang Chemical Plant, Qingdao, People's Republic of China). MCI gel (CHP20P, 75-150  $\mu$ m, Mitsubishi Chemical Industries Ltd.), and Sephadex LH-20 gel (Amersham Biosciences) were used for column chromatography. TLC spots were visualized under UV light and by dipping into a solution 5% H<sub>2</sub>SO<sub>4</sub> in alcohol followed by heating.

**Plant material.** Branches of *E. chinensis* R. Br. were collected in Jiangxi, China, in June, 2012 and authorized by Professor Fuwu Xing of South China Botanical Garden. A voucher specimen (No. 201309) has been deposited at the Laboratory of Natural Product Chemistry Biology, South China Botanical Garden (SCBG), CAS, People's Republic of China.

**Extraction and isolation.** Powdered air-dried branches of *E. chinensis* (50.0 kg) were extracted using 95% ethanol at room temperature and filtered. Then, the filtrate was concentrated under vacuum to afford a crude residue (4.1 kg), which was suspended in H<sub>2</sub>O and extracted sequentially with *n*-hexane and EtOAc. The EtOAc-soluble fraction (1.2 kg) was further subjected to silica gel column chromatography (CC) eluted with a gradient solvent mixture of *n*-hexane/acetone (ratio from 100:1 to 1:1) to afford 7 sub-fractions (F-1→F-7). F-4 (237 g) was further separated by silica gel CC eluted with a gradient mixture of CH<sub>2</sub>Cl<sub>2</sub>/EtOAc to afford six fractions (F-4A→F-4F). F-4C (36.5 g) was again fractionated on MCI-silica gel CC using an eluting solvent mixture of CH<sub>3</sub>OH/H<sub>2</sub>O of decreasing polarity to give 7 fractions (F-4C1→F-4C7). Pure compound **1** (50 mg) was obtained from F-4C1 (4.9 g) using CC with Sephadex LH-20 (183  $\times$  3 cm; CHCl<sub>3</sub>/MeOH 1:1 as eluent), followed by recrystallization (CH<sub>3</sub>OH). Similarly, F-4E (32.6 g) was fractionated on MCI-silica gel CC using a solvent mixture CH<sub>3</sub>OH/H<sub>2</sub>O of decreasing polarity to give five fractions (F-4E1→F-4E5). As a result, **2** (20 mg) was purified from F-4E2 (4.6 g) by silica gel CC eluted using a mixture of *n*-hexane/EtOAc (1:2) followed by recrystallization from CH<sub>3</sub>OH.

*Euryachin A (1)*: Colorless crystal; [ $\alpha$ ]<sub>D</sub><sup>20</sup> = + 269.2 (*c.* 1.20; CH<sub>3</sub>OH); UV (CH<sub>3</sub>OH)  $\lambda_{\max}$  (log  $\epsilon$ ) 274.7 (4.03) nm; IR (KBr)  $\nu_{\max}$  3464, 2953, 2868, 1740, 1690, 1633, 1389, 1195, 991, 816, 639 cm<sup>-1</sup>; <sup>1</sup>H NMR (CDCl<sub>3</sub>, 500 MHz) and <sup>13</sup>C NMR (CDCl<sub>3</sub>, 125 MHz) see Table 1 in the

manuscript; CD  $\Delta\epsilon$  ( $c$  0.13, CH<sub>3</sub>OH) + 29.3 (276.2 nm); HR-ESI-MS  $m/z$  <sub>obsd</sub> 327.1612 [M-H]<sup>-</sup> ( $m/z$  <sub>calcd</sub> [C<sub>20</sub>H<sub>24</sub>O<sub>4</sub> - H]<sup>-</sup> = 327.1596).

*Euryachin B (2)*: Colorless crystal;  $[\alpha]_D^{20} = +91.3$  ( $c$  1.15; CH<sub>3</sub>OH); UV (CH<sub>3</sub>OH)  $\lambda_{\max}$  (log  $\epsilon$ ) 274.7 (4.12) nm; IR (KBr)  $\nu_{\max}$  2955, 2864, 1681, 1625, 1412, 1275, 932, 817, 734 cm<sup>-1</sup>; <sup>1</sup>H NMR (CD<sub>3</sub>OD, 500 MHz) and <sup>13</sup>C NMR (CD<sub>3</sub>OD, 125 MHz) see Table 1 in the manuscript; CD  $\Delta\epsilon$  ( $c$  0.40, CH<sub>3</sub>OH) + 20.5 (281.3 nm); HR-ESI-MS  $m/z$  <sub>obsd</sub> 329.1786 [M-H]<sup>-</sup> ( $m/z$  <sub>calcd</sub> [C<sub>20</sub>H<sub>24</sub>O<sub>4</sub> - H]<sup>-</sup> = 329.1753).

#### Anti-inflammatory activity assay.

Extracellular NO production detection: Murine monocytic RAW264.7 Macrophages (Conservation Genetics Kunming Cell Bank, Kunming Institute of Zoology. CAS, China) were dispensed into 96-well plates ( $5 \times 10^5$  cells/well) containing DMEM medium (Gibco BRL Co., Ltd., Grand Island, NY, USA) with 10% FBS (Gibco BRL Co., Ltd., Grand Island, NY, USA) under a humidified atmosphere of 5% CO<sub>2</sub> at 37 °C. After 24 h preincubation, cells were treated with serial dilutions of compounds **1** and **2**, the maximum concentration being 200  $\mu$ M, in the presence of 1  $\mu$ g/mL LPS (Sigma-Aldrich Co., Ltd., USA) for 18 h. Each compound was dissolved in DMSO (Sigma-Aldrich Co., Ltd., USA) and further diluted in medium to produce different concentrations. NO production in each well was assessed by adding 100  $\mu$ L of Griess reagent (Reagent A & Reagent B, respectively, Beyotime Co., Ltd., Shanghai, China) to 100  $\mu$ L of each supernatant [LPS (Sigma)-treated or LPS- and compound-treated cells] in triplicate. After 5 min incubation, the absorbance was measured at 420 nm with a Multiscan Spectrum (TECAN Genios). L-NMMA (N<sup>G</sup>-Monomethyl-L-arginine, Monoacetate Salt, Beyotime Co., Ltd., Shanghai, China) was used as a positive control.

**Table 1**

IC<sub>50</sub> values ( $\mu$ M) of **1** and **2** for NO inhibition in LPS-stimulated RAW264.7 cells.

| Compounds     | IC <sub>50</sub> ( $\mu$ M) <sup>a</sup> |
|---------------|------------------------------------------|
| <b>1</b>      | 46.09                                    |
| <b>2</b>      | 36.96                                    |
| <b>L-NMMA</b> | 36.21                                    |

<sup>a</sup> IC<sub>50</sub> values of each compound were expressed as the concentration ( $\mu$ M), which caused 50% inhibition of NO production

Intracellular NO production detection: The intracellular NO level was measured using a NO-sensitive fluorescence probe DAF-FM DA. First,  $1 \times 10^5$  Raw264.7 macrophage cells (Conservation Genetics Kunming Cell Bank, Kunming Institute of Zoology. CAS, China) per well were grown in triplicate in 96-well plates. Cells were treated with compounds **1** and **2** at different concentrations (0, 5, 10, 20, 40  $\mu$ g/mL) and LPS (1  $\mu$ g/mL) (Sigma-Aldrich Co., Ltd., USA) in 1h increments for 24 h, or were untreated (negative control). Then, removed supernatant and cells were loaded with DAF-FM DA (5 $\mu$ M, 100  $\mu$ L/well) (Beyotime Co., Ltd., Shanghai, China) at 37 °C for 30 min. Fluorescence values (excitation 495 nm, emission 515 nm) were measured using a

Multimode Microplate Reader (Synergy™ 2, BioTek, Winooski, Vermont, USA).

The inhibitory effects of compounds 1 and 2 on NO overproduction in LPS-stimulated RAW264.7 macrophages were examined to evaluate the anti-inflammatory effect of PNFS. Extracellular NO concentrations were assessed using the Griess method, and intracellular NO concentrations were examined using a DAF-FM DA fluorescence assay. Compounds 1 and 2 (0, 5, 10, 20, 40  $\mu$ g/mL) markedly decreased intracellular NO concentrations ( $P < 0.001$ ,  $P < 0.001$ ,  $P < 0.001$ ) (Fig. 1). In summary, our experiments showed that compounds 1 and 2 suppressed LPS-stimulated NO overproduction.

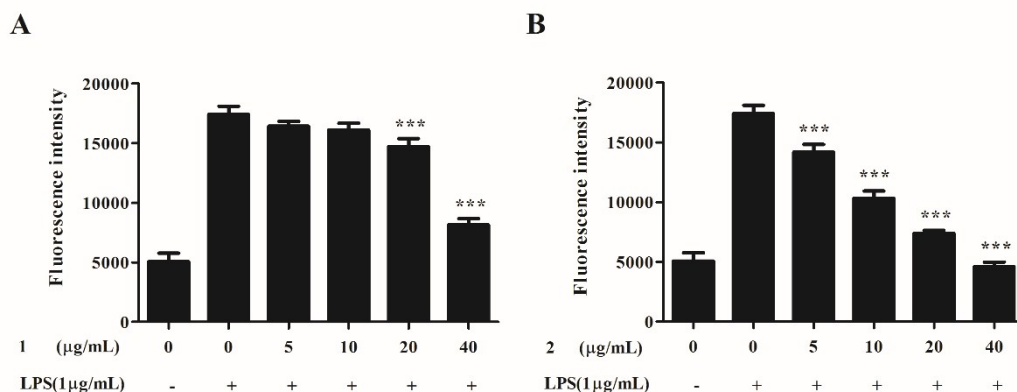

Fig. 1 compounds 1 and 2 suppressed NO overproduction in LPS-stimulated RAW264.7 macrophages. A compound 1 decreased LPS-stimulated NO overproduction. B compound 2 reduced LPS-stimulated intracellular NO levels. The first two bars at “0” in Fig. A, B are negative control (without this two compounds and LPS treated) and positive control (without Compounds 1 and 2 but with LPS treated). Data in Fig. A, B were all expressed as the mean (SD) of 3 independent experiments. One-Way ANOVA test was used to analyzed the data and the results were  $F = 121$ ;  $P < 0.001$ ,  $F = 274$ ;  $P < 0.001$ ; respectively. Then, data in Fig. A, B were all subjected to Dunnett's Multiple Comparison Test to determine the statistical difference between groups. The  $P$  values represented the statistical differences between each group and the corresponding positive control (without Compounds 1 and 2 with LPS treated). \*\*\* means  $P < 0.001$

## 2. X-ray crystal data for euryachin A (1)

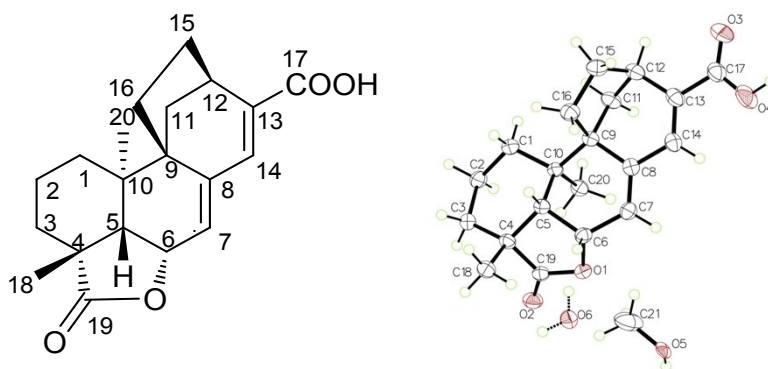

## Crystal data and structure refinement for euryachin A

|                                             |                                                                                                                          |
|---------------------------------------------|--------------------------------------------------------------------------------------------------------------------------|
| Identification code                         | SONGJIALING_43-3B                                                                                                        |
| Empirical formula                           | C <sub>83</sub> H <sub>110</sub> O <sub>20</sub>                                                                         |
| Formula weight                              | 1427.71                                                                                                                  |
| Temperature/K                               | 173.00(10)                                                                                                               |
| Crystal system                              | orthorhombic                                                                                                             |
| Space group                                 | P2 <sub>1</sub> 2 <sub>1</sub> 2 <sub>1</sub>                                                                            |
| Unit cell dimensions                        | a = 6.27813(14) Å, α = 90.00°<br>b = 10.3446(2) Å, β = 90.00°<br>c = 27.8319(6) Å, γ = 90.00°<br>90.00<br>90.00<br>90.00 |
| Volume/Å <sup>3</sup>                       | 1807.55(7)                                                                                                               |
| Z                                           | 1                                                                                                                        |
| ρ <sub>calc</sub> /cm <sup>3</sup>          | 1.312                                                                                                                    |
| μ/mm <sup>-1</sup>                          | 0.753                                                                                                                    |
| F(000)                                      | 768.0                                                                                                                    |
| Crystal size/mm <sup>3</sup>                | 0.28 × 0.26 × 0.2                                                                                                        |
| Radiation                                   | CuKα (λ = 1.54184)                                                                                                       |
| θ range for data collection/°               | 9.12 to 125.4                                                                                                            |
| Index ranges                                | -7 ≤ h ≤ 4, -11 ≤ k ≤ 11, -32 ≤ l ≤ 32                                                                                   |
| Reflections collected                       | 14188                                                                                                                    |
| Independent reflections                     | 2873 [R <sub>int</sub> = 0.0305, R <sub>sigma</sub> = 0.0177]                                                            |
| Data/restraints/parameters                  | 2873/0/252                                                                                                               |
| Goodness-of-fit on F <sup>2</sup>           | 1.093                                                                                                                    |
| Final R indexes [I >= 2σ (I)]               | R <sub>1</sub> = 0.0365, wR <sub>2</sub> = 0.0984                                                                        |
| Final R indexes [all data]                  | R <sub>1</sub> = 0.0369, wR <sub>2</sub> = 0.0987                                                                        |
| Largest diff. peak/hole / e Å <sup>-3</sup> | 0.49/-0.17                                                                                                               |
| Flack parameter                             | 0.1(2)                                                                                                                   |

### 3. NMR, IR, HRESIMS, UV and CD spectral data:



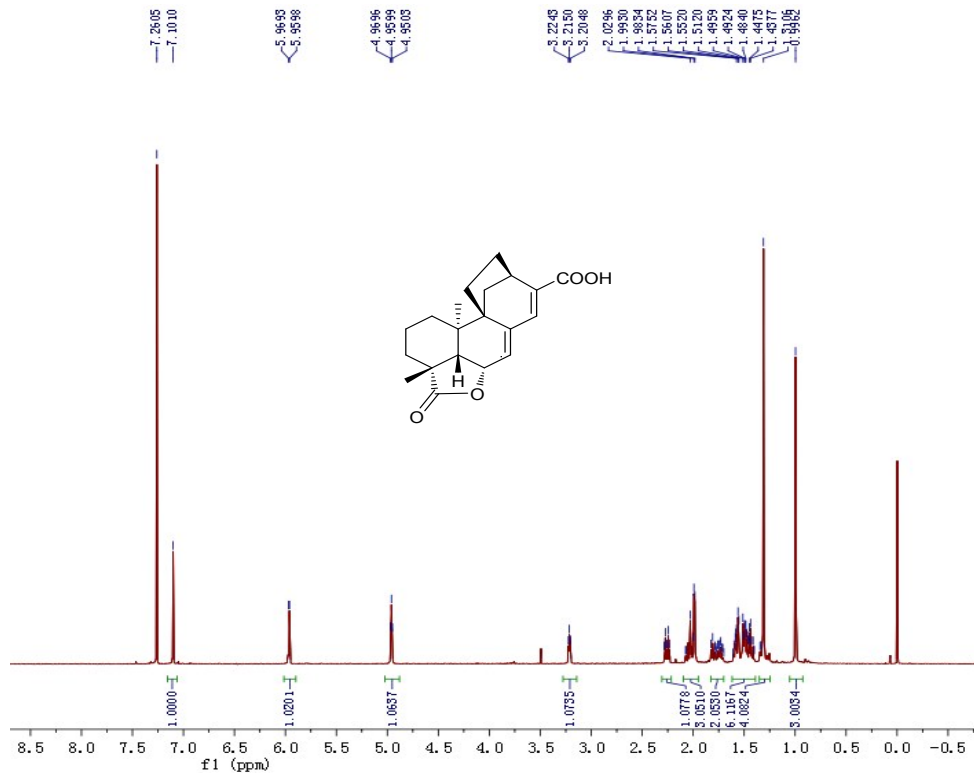

S1. <sup>1</sup>H NMR (500 MHz; CDCl<sub>3</sub>) spectrum of euryachin A (1)

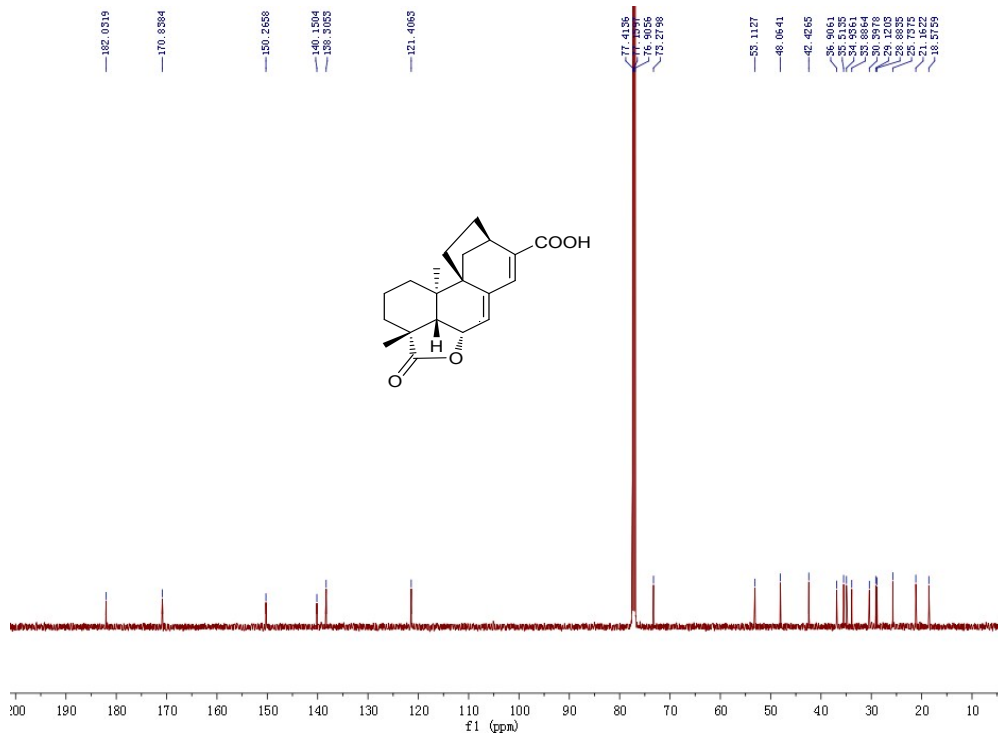

S2. <sup>13</sup>C NMR (125 MHz; CDCl<sub>3</sub>) spectrum of euryachin A (1)



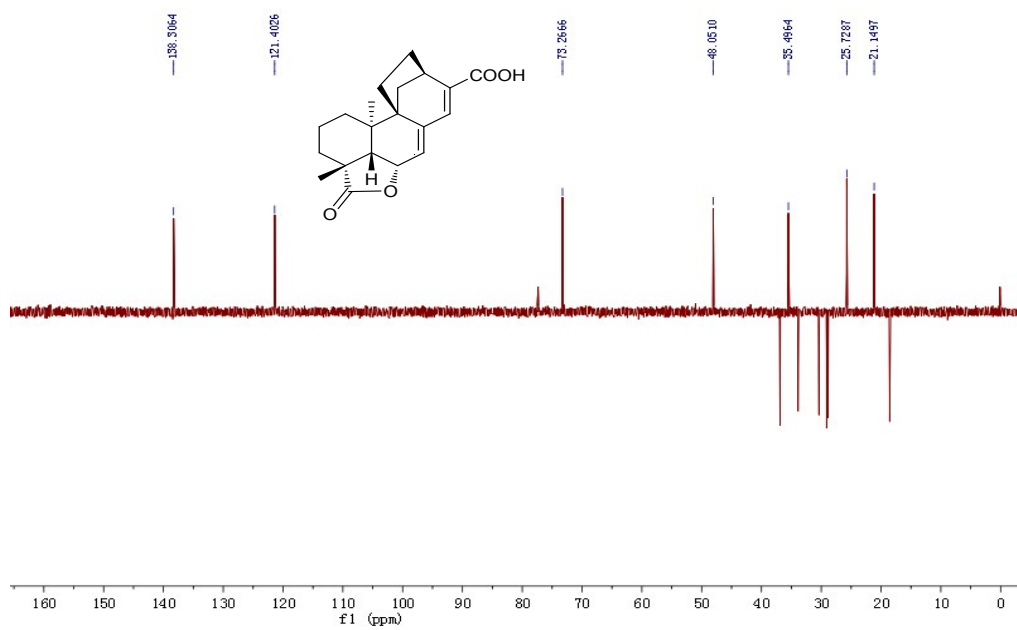

S3. DEPT-135 (125 MHz; CDCl<sub>3</sub>) spectrum of euryachin A (**1**)

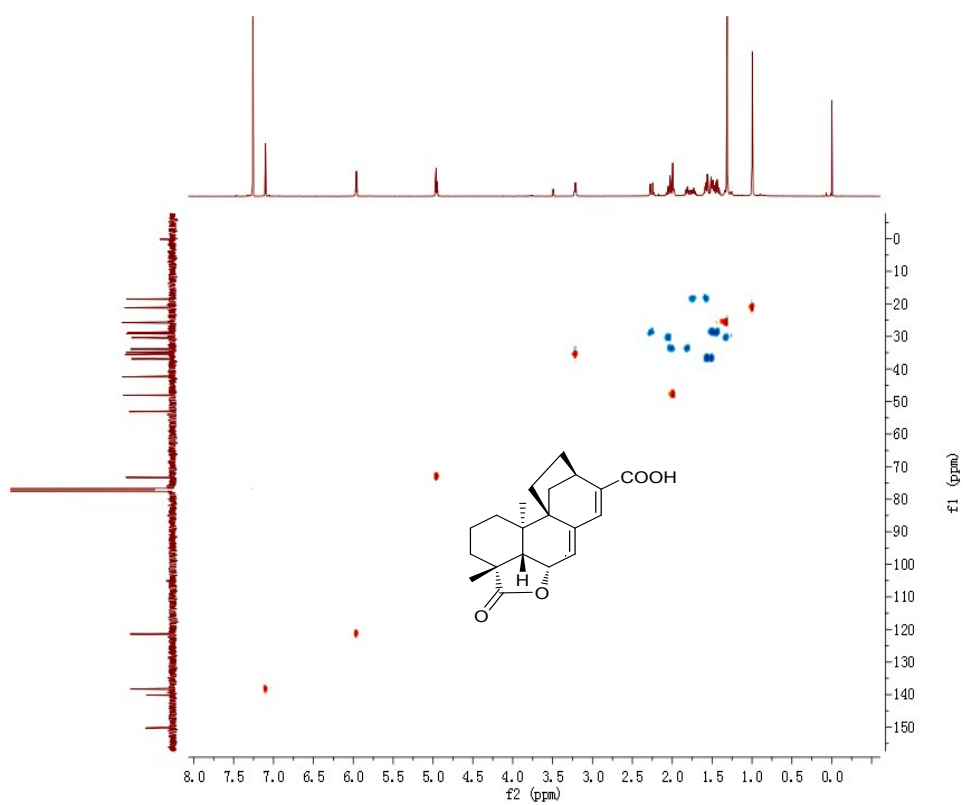

S4. HSQC (CDCl<sub>3</sub>) spectrum of euryachin A (**1**)

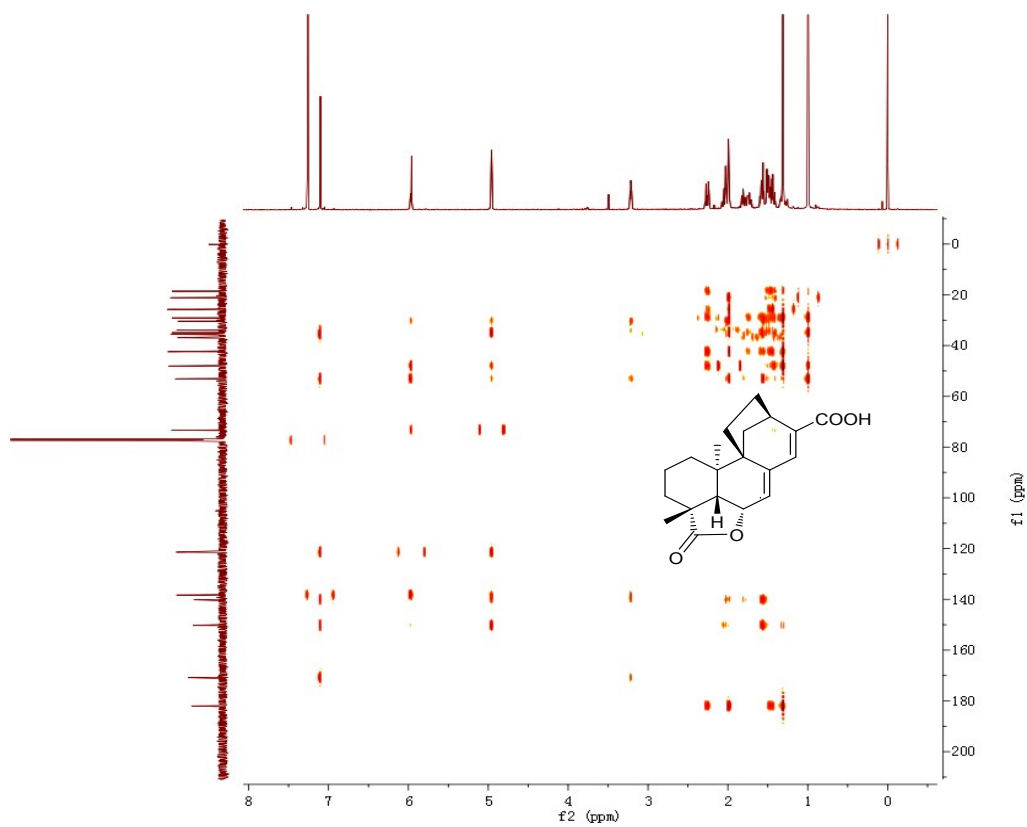

S5. HMBC (CDCl<sub>3</sub>) spectrum of euryachin A (**1**)

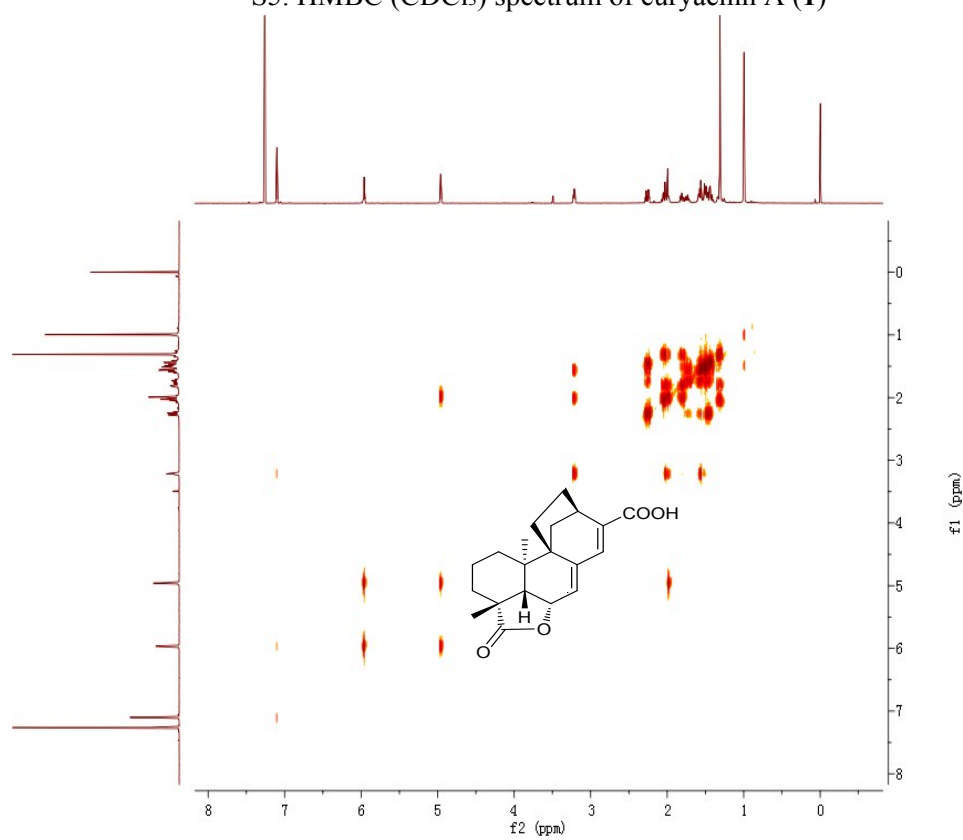

S6. <sup>1</sup>H-<sup>1</sup>H COSY (CDCl<sub>3</sub>) spectrum of euryachin A (**1**)

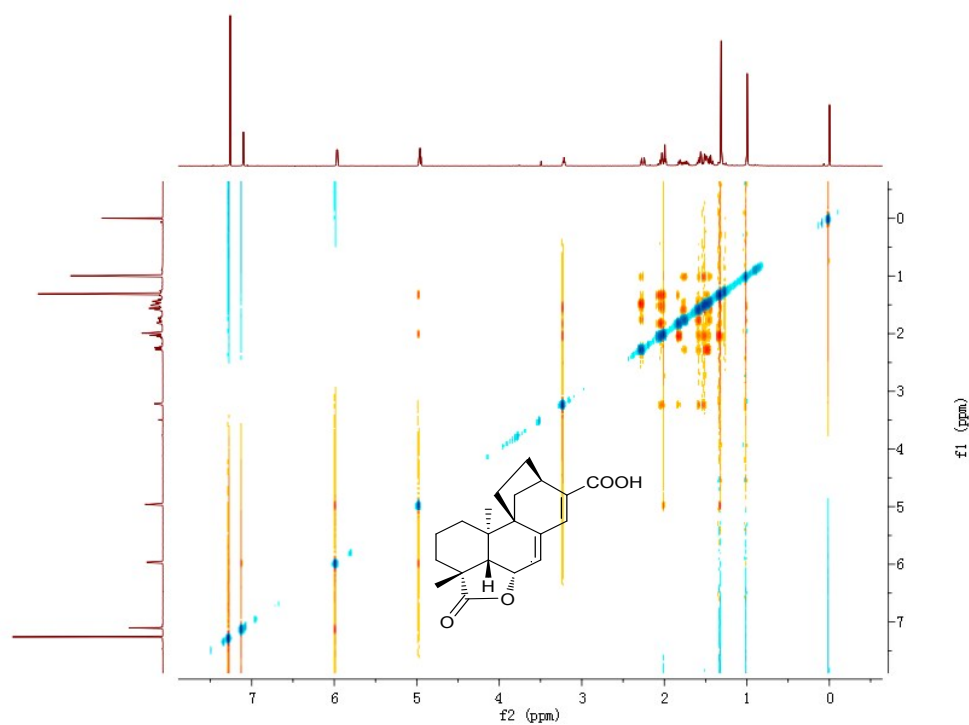

S7. NOESY (CDCl<sub>3</sub>) spectrum of euryachin A (**1**)

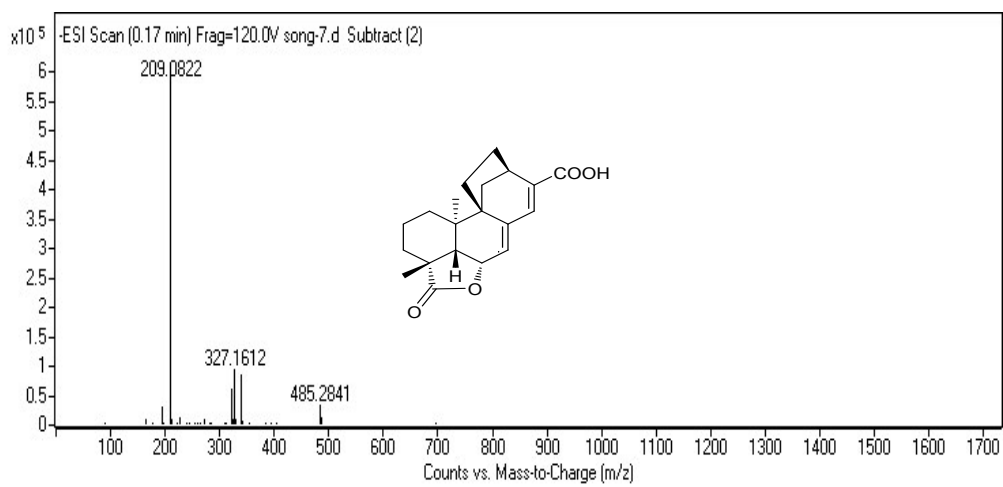

S8. HRESIMS of euryachin A (**1**)

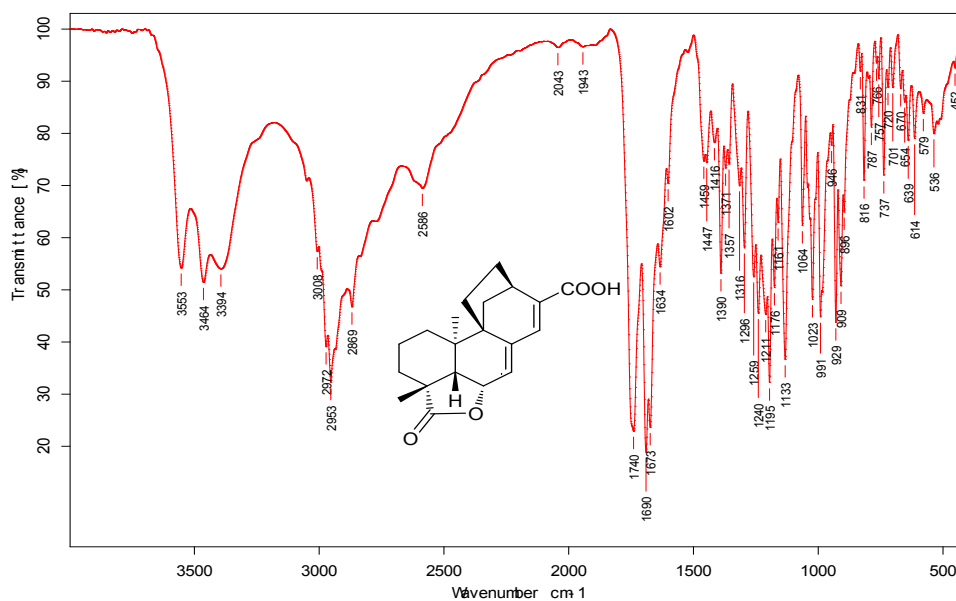

S9. IR spectrum of euryachin A (1)

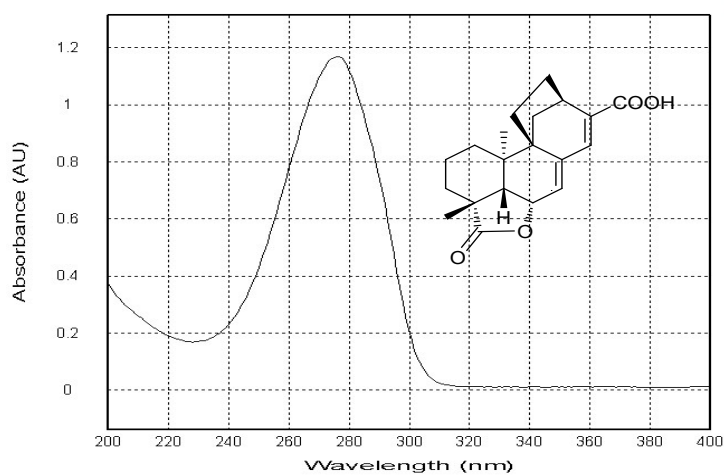

SONG7-UV.dsx::Subtrac

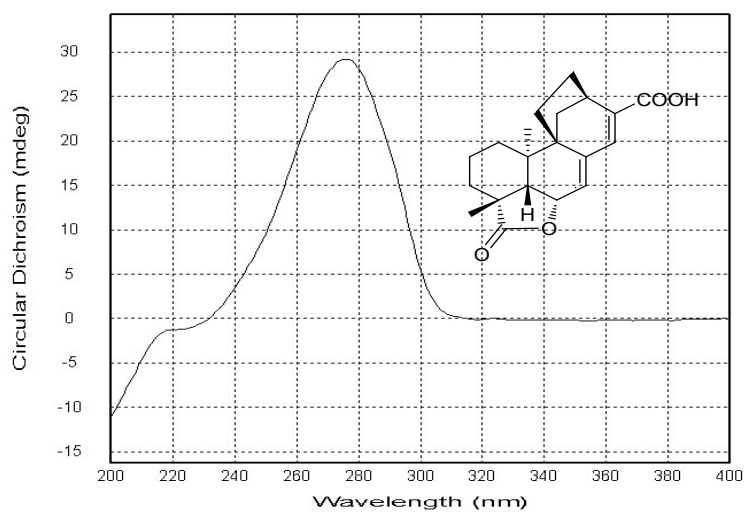

SONG7.dsx::Smooth (s)

S10. UV (CH<sub>3</sub>OH) spectra and experimental ECD (in CH<sub>3</sub>OH) of euryachin B (1)





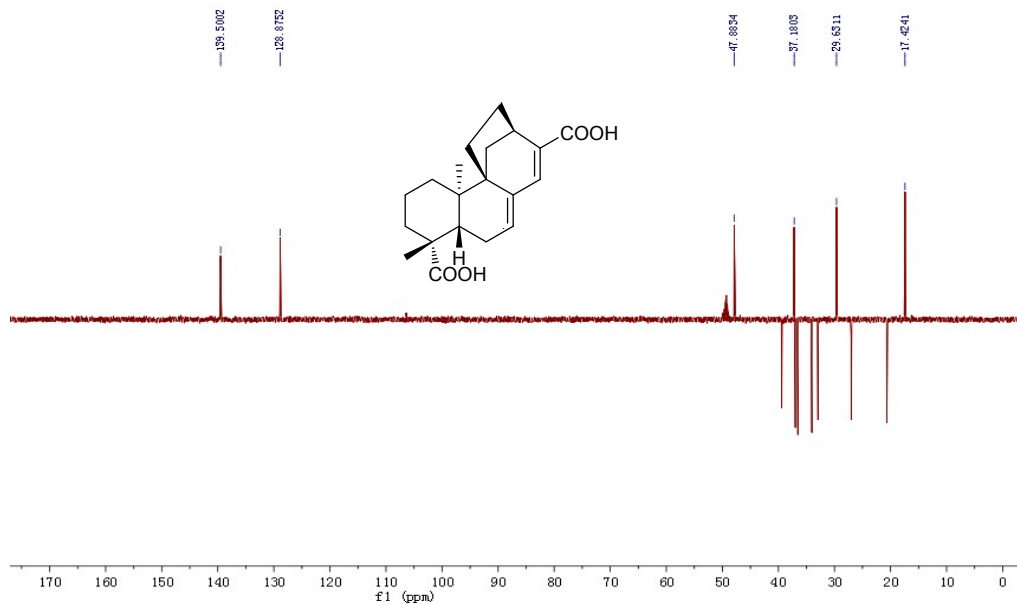

S13. DEPT-135 (125 MHz; CD<sub>3</sub>OD) spectrum of euryachin B (2)

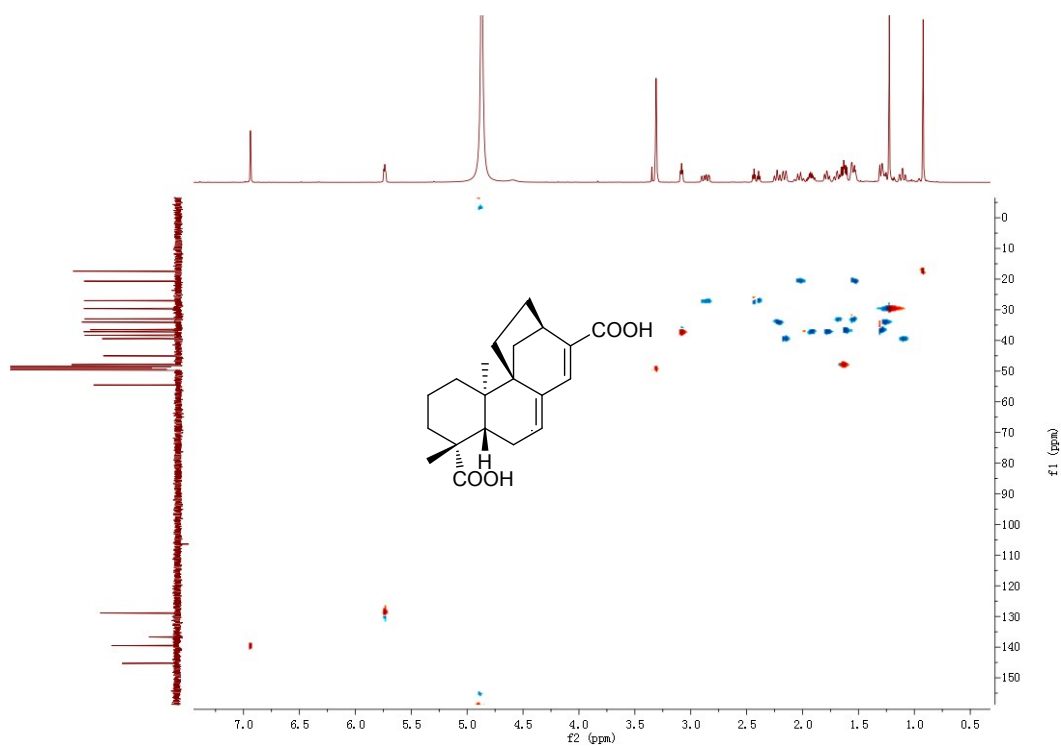

S14. HSQC (CD<sub>3</sub>OD) spectrum of euryachin B (2)

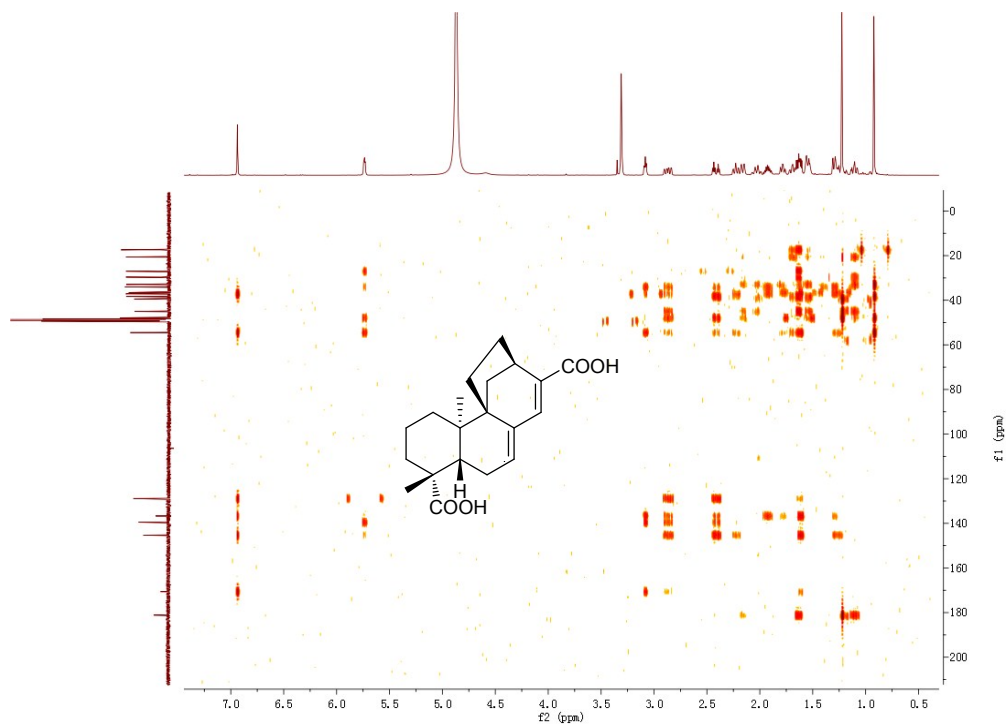

S15. HMBC (CD<sub>3</sub>OD) spectrum of euryachin B (**2**)

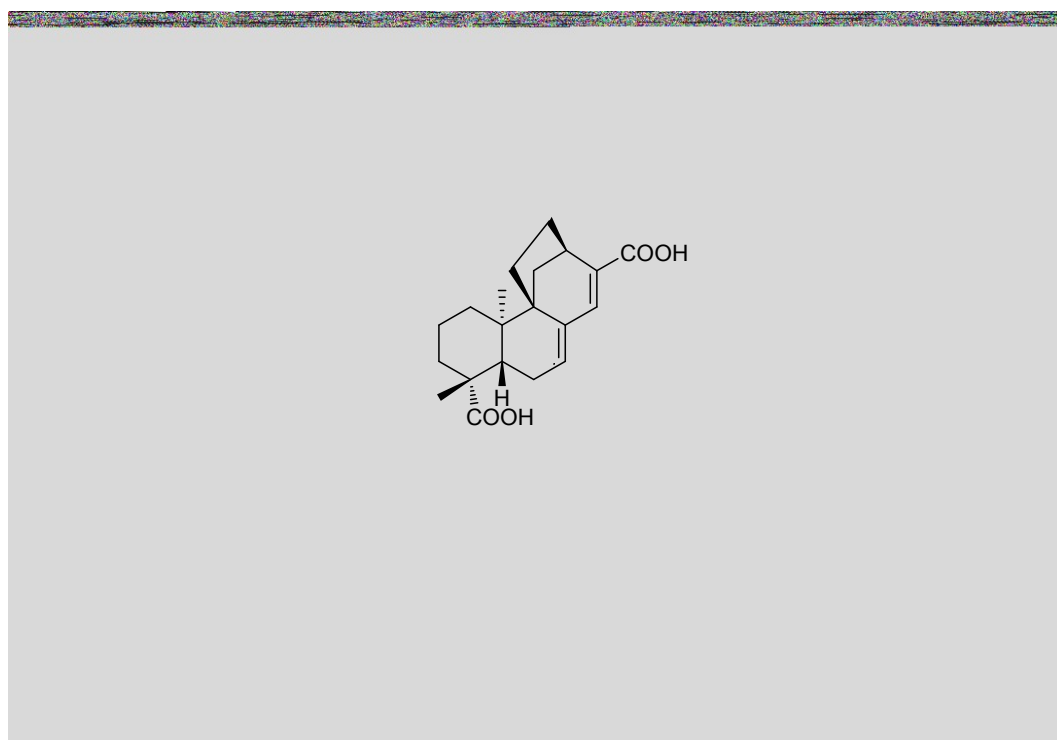

S16. <sup>1</sup>H-<sup>1</sup>H COSY (CD<sub>3</sub>OD) spectrum of euryachin B (**2**)



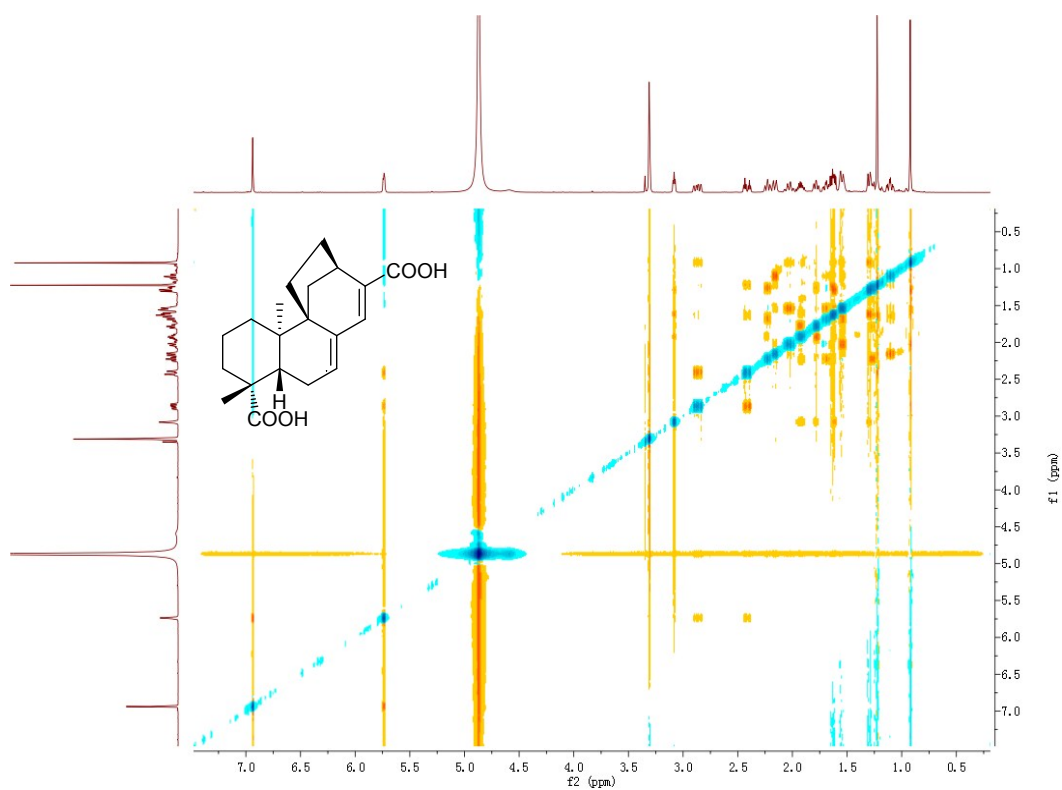

S17. NOESY (CD<sub>3</sub>OD) spectrum of euryachin B (2)

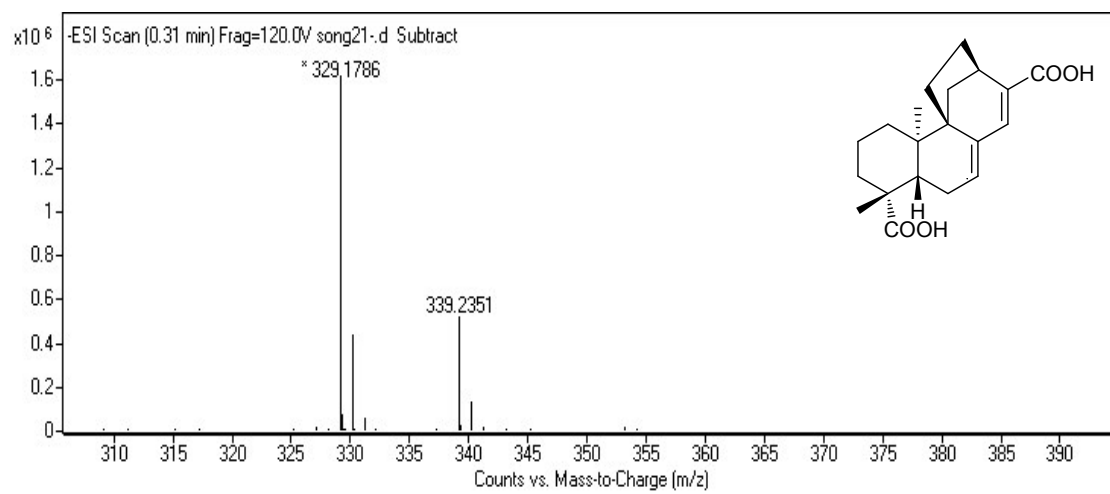

S18. HRESIMS of euryachin B (2)

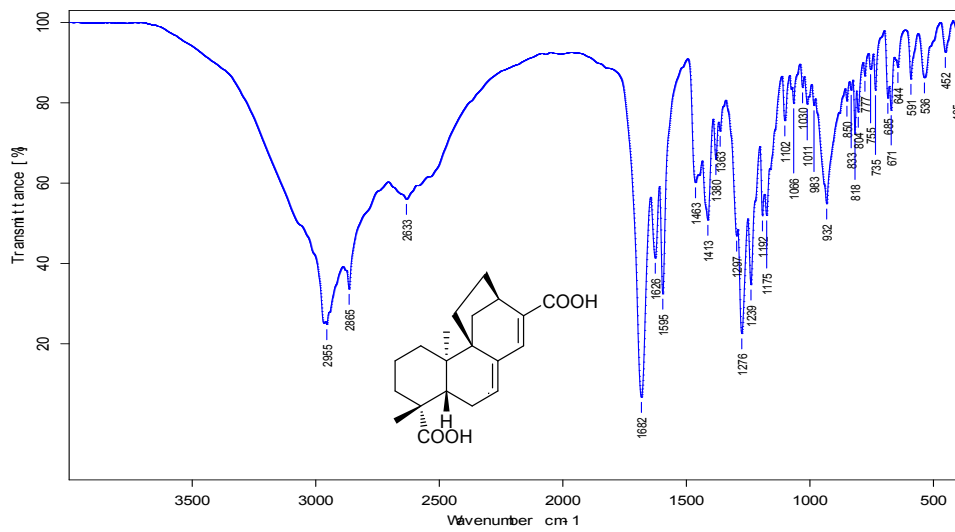

S19. IR spectrum of euryachin B (2)

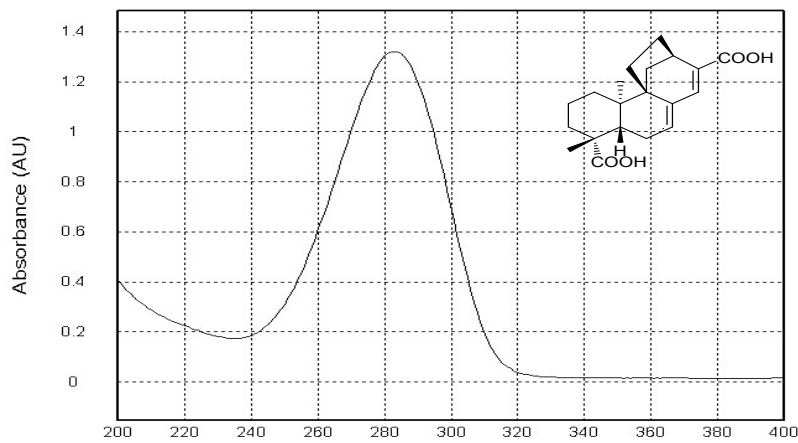

SONG21-UV.dsx::Subtra

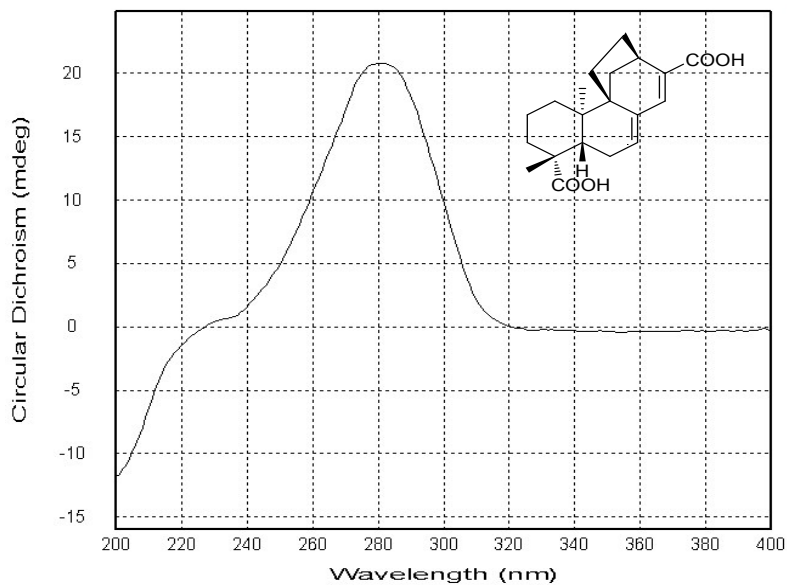

SONG21.dsx::Smooth (s)

S20. UV ( $\text{CH}_3\text{OH}$ ) spectra and experimental ECD (in  $\text{CH}_3\text{OH}$ ) of euryachin B (2)
